# Supplementary material
Source: PubMed Central journal article supplement (PMC9464692)
Supplement: NIHMS1808306-supplement-2.pdf [file NIHMS1808306-supplement-2.pdf]

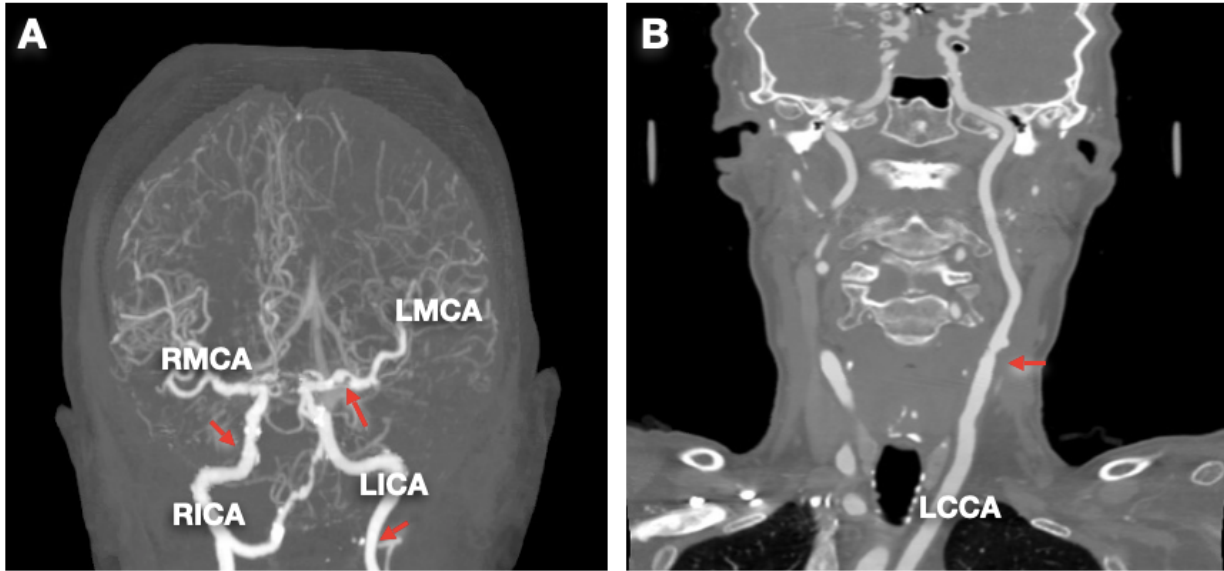

**Figure S2. Head and Neck computed tomography angiography demonstrating multifocal atherosclerotic disease in the left internal carotid artery of a subject with RIPLe.**

A) Head and B) Neck CTA demonstrating multifocal atherosclerotic disease in Case #2. Red arrows indicate the stenoses. CTA, computed tomography angiography; LMCA, left middle cerebellar artery; RMCA, right middle cerebellar artery; RICA, right internal carotid artery; LICA, left internal carotid artery; LCCA, left common carotid artery.
