# Supplementary material
Source: PubMed Central journal article supplement (PMC9464692)
Supplement: NIHMS1808306-supplement-3.pdf [file NIHMS1808306-supplement-3.pdf]

**Table S1.** Demographics and medical history of study subjects.

| <b>Case</b> | <b>Age</b> | <b>Sex</b> | <b>Past medical history</b> | <b>Follow up / New findings and interventions</b>                                                                                                                                        |
|-------------|------------|------------|-----------------------------|------------------------------------------------------------------------------------------------------------------------------------------------------------------------------------------|
| <b>1</b>    | 70-80      | M          | HTN                         | Multi-vessel CAD. The patient underwent a CABG procedure.                                                                                                                                |
| <b>2</b>    | 70-80      | F          | HTN                         | Significant, calcified, and non-calcified atherosclerotic disease with stenosis of the left carotid artery (50-69%). The patient underwent left carotid artery stenting and angioplasty. |
| <b>3</b>    | 70-80      | M          | HTN                         | Reduced ejection fraction (48%), right bundle branch block and multiple premature atrial contractions noted on a 24-hour event monitor.                                                  |
| <b>4</b>    | 40-50      | F          | Obstructive sleep apnea     | Renovascular HTN.                                                                                                                                                                        |
| <b>5</b>    | 60-70      | F          | HTN, breast cancer          | Uncontrolled HTN and mildly impaired LV diastolic filling.                                                                                                                               |
| <b>6</b>    | 60-70      | M          | HTN                         | Moderate size chronic infarct of the right frontal lobe, small left posterior parietal chronic infarct and scattered lacunar infarcts of the bilateral cerebellar hemispheres, the right |

RIPLe in cardiovascular disease – Supplementary Data

caudate body and the right thalamus noted on brain magnetic resonance imaging. Moderately dilated left atrium and early positive saline contrast bubble study consistent with patent foramen ovale noted on transthoracic echocardiogram.

|   |       |   |                        |                                                                                                                                                                                                                                                                                                      |
|---|-------|---|------------------------|------------------------------------------------------------------------------------------------------------------------------------------------------------------------------------------------------------------------------------------------------------------------------------------------------|
| 7 | 80-90 | F | HTN and stage 4<br>CKD | A carotid ultrasound showed no evidence of hemodynamically significant flow abnormalities in the carotid arteries, but was suggestive of right subclavian steal. Magnetic resonance angiography showed tandem stenoses of the right subclavian artery consistent with vertebrobasilar insufficiency. |
| 8 | 70-80 | M | HTN                    | Soft irregular atherosclerotic plaque was noted on the left carotid bulb                                                                                                                                                                                                                             |
| 9 | 60-70 | F | None                   | Mild right carotid bulb non-calcified plaque and mild left carotid bulb calcified plaque found on duplex ultrasound of carotid arteries.                                                                                                                                                             |

RIPs in cardiovascular disease – Supplementary Data

**10**    70-80    M    HTN    Mildly impaired LV diastolic filling  
noted on echocardiogram

**11**    60-70    F    None    No significant arrhythmia on a two-  
week cardiac monitor. Normal  
echocardiogram.

**Abbreviations:** HTN, hypertension; CABG, coronary artery bypass grafting; CAD, coronary artery disease; HF, heart failure; LV, left ventricular; CKD, chronic kidney disease.
